# Supplementary material for: Novel nanoporous covalent organic frameworks for the selective extraction of endogenous peptides
Source: Royal Society of Chemistry journal article supplement (doi:10.1039/c8ra07500j), 2018-01-01
Supplement: c8ra07500j1.pdf [file c8ra07500j1.pdf]

Supporting Information for

**Novel nanoporous covalent organic frameworks for  
the selective extraction of endogenous peptides**

Xiaofei Zhang,<sup>#</sup> Guangyan Qing,<sup>#</sup> Long Yu, Hongjian Kang, Cheng Chen, Xiuling Li,<sup>\*</sup> and  
Xinmiao Liang<sup>\*</sup>

*Key Laboratory of Separation Science for Analytical Chemistry, Dalian Institute of Chemical  
Physics, Chinese Academy of Sciences, 457 Zhongshan Road, Dalian 116023, P. R. China.*

*<sup>#</sup>These authors contributed equally to this work.*

*E-mail: [lixiling@dicp.ac.cn](mailto:lixiling@dicp.ac.cn), [liangxm@dicp.ac.cn](mailto:liangxm@dicp.ac.cn),*

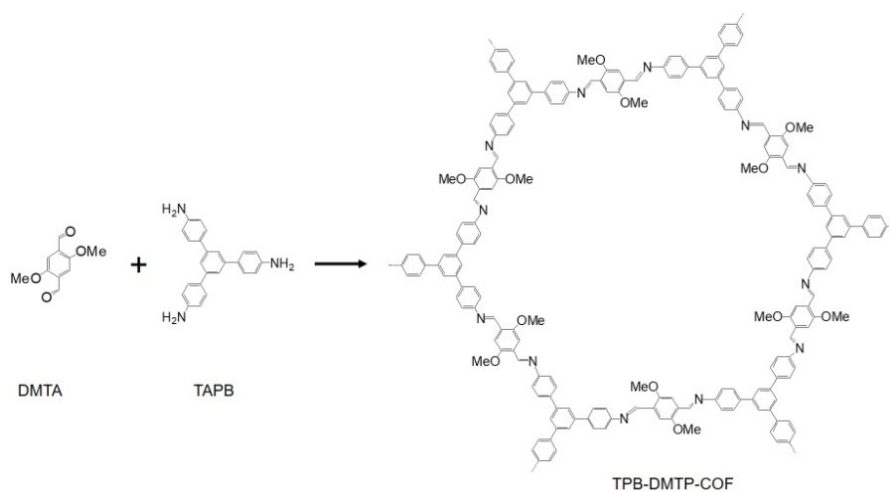

**Scheme S1.** Synthesis of TPB-DMTP-COF through the condensation of DMTA and TAPB.

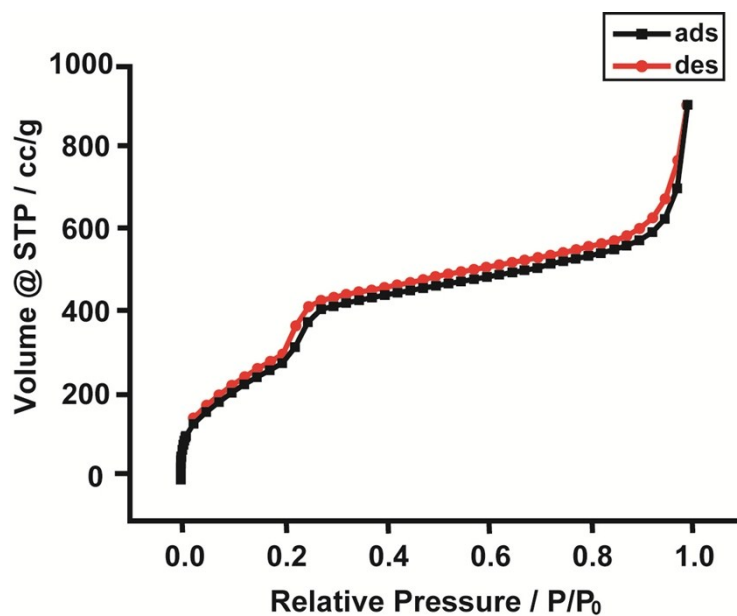

**Figure S1.** Nitrogen adsorption/desorption isotherm of TPB-DMTP-COF. The nitrogen adsorption/desorption isotherm revealed a type-IV curve, indicating the mesostructure of TPB-DMTP-COF.

**Figure S2.** Water contact angle of MCM-41 (A) and TPB-DMTP-COF (B).

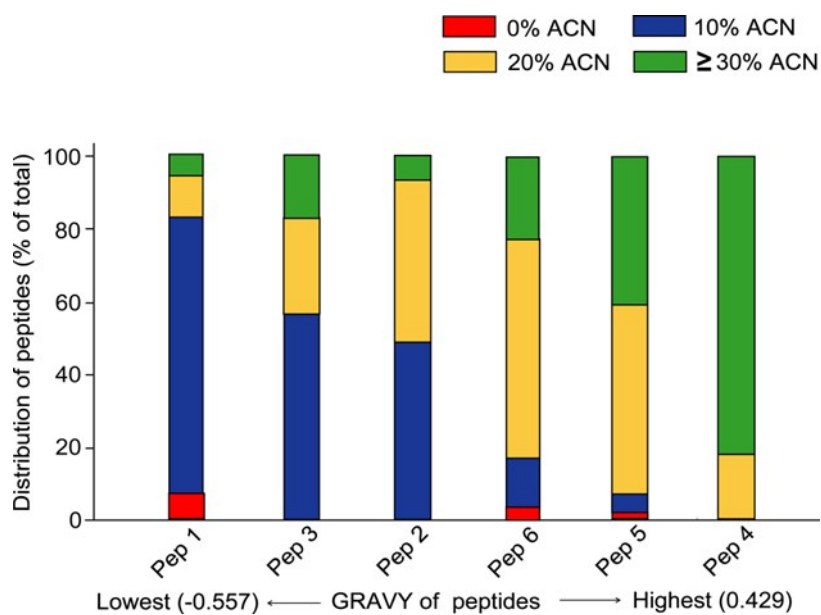

**Figure S3.** The relationship of GRAVY value and distribution of peptides.

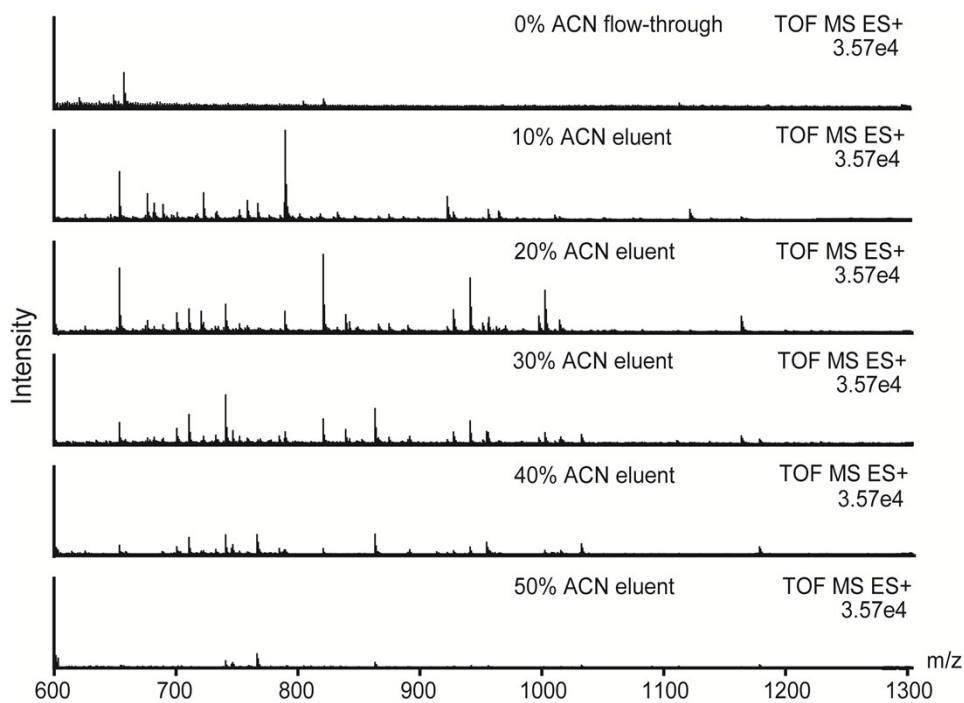

**Figure S4.** The distribution of BSA tryptic digests in fractions eluted with 0-50% ACN from TPB-DMTP-COF at pH 5.9. The majority of BSA tryptic peptides distributed in the eluents with 10-40% ACN.

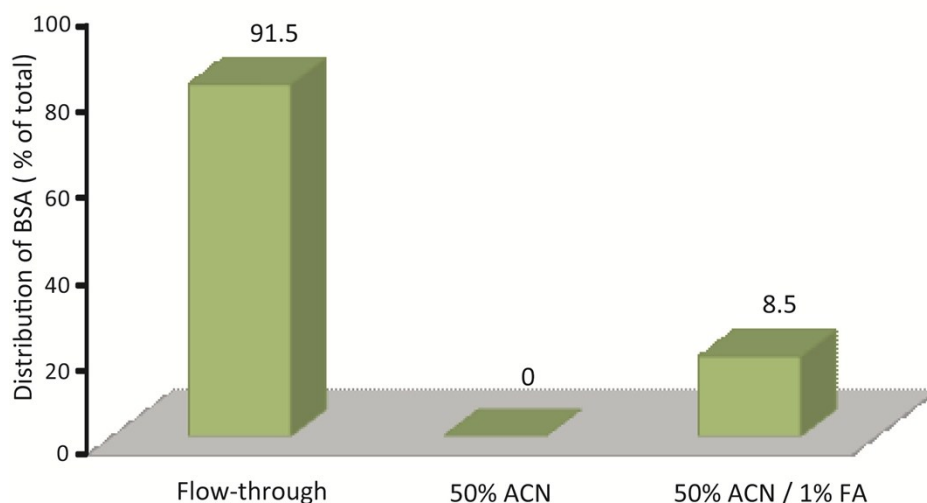

**Figure S5.** The distribution of BSA protein in flow-through and fractions eluted with 50% ACN and 50% ACN/1% FA from TPB-DMTP-COF. 91.5% of the BSA protein were detected in flow-through for the size-exclusion of TPB-DMTP-COF, only 8.5% of the BSA protein (adsorbed on the hydrophobic external surface of TPB-DMTP-COF) were detected in 50% ACN/1% FA.

### **Calculation of ratio between external surface area and total surface area of TPB-DMTP-COF**

The external surface area of TPB-DMTP-COF particles was estimated via assuming the particles are solid spheres and the external surface area of 1g TPB-DMTP-COF was the specific surface area of the solid spheres. Assumed the specific surface area is “S”, partical size is “d”, quantity of particles in 1g TPB-DMTP-COF is “n”, density of particles is “p”, the surface area equation is as follows:

$$1 = \frac{n\rho\pi d^3}{6}$$

$$n = \frac{6}{\rho \pi d^3}$$

$$S = n \pi d^2 = \frac{6}{\rho \pi d^3} \cdot \pi \cdot d^2 = \frac{6}{\rho d}$$

Assumed the density of TPB-DMTP-COF particles is  $1 \text{ kg m}^{-3}$ , particle size measured with TEM is around  $100 \text{ nm}$ , the external surface area of  $1 \text{ g}$  TPB-DMTP-COF particles is approximately  $60 \text{ m}^2$ , which accounts for  $7.3 \%$  of the total surface area ( $826.5 \text{ m}^2$ ) of  $1 \text{ g}$  TPB-DMTP-COF acquired from  $\text{N}_2$  sorption-desorption isotherms.

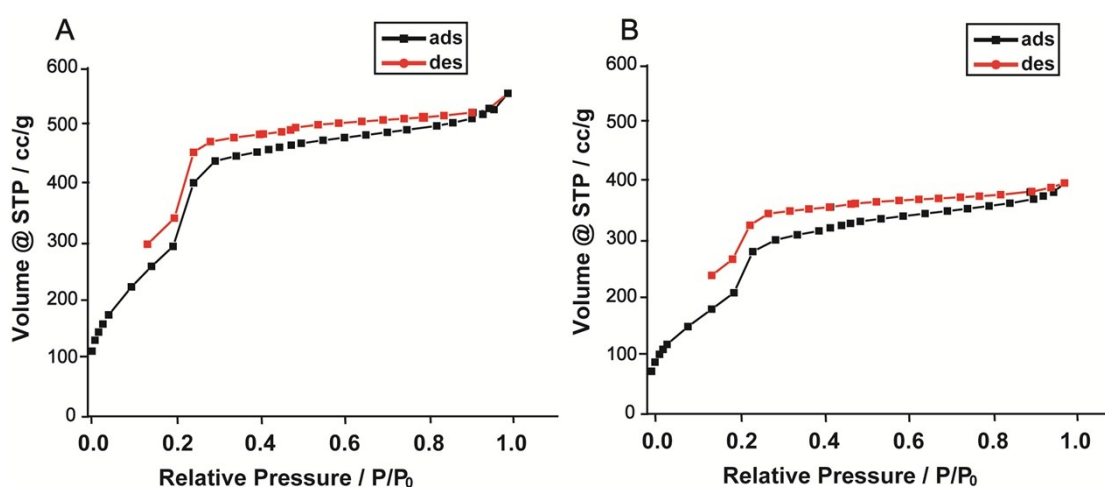

**Figure S6.** Nitrogen adsorption/desorption isotherm of TPB-DMTP-COF after incubation with BSA protein (A) and BSA tryptic peptides (B). Measurements of the extent of  $\text{N}_2$  adsorption indicated that, the pore volume of TPB-DMTP-COF was  $8.516 \times 10^{-1} \text{ cc/g}$ , the pore volumes of TPB-DMTP-COF after incubation with BSA protein and BSA tryptic peptides were  $8.602 \times 10^{-1} \text{ cc/g}$  and  $6.150 \times 10^{-1} \text{ cc/g}$ , respectively. The pore volume of TPB-DMTP-COF decreased by about  $27.8\%$  after the adsorption of the BSA tryptic peptides, but those were almost unchanged after the adsorption of BSA.

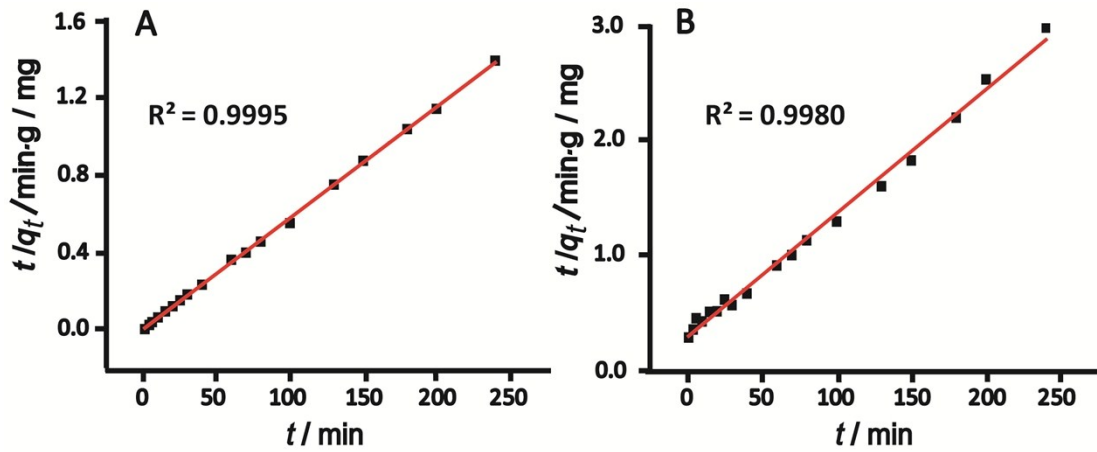

**Figure S7.** Linear fitting curves with the adsorption kinetic data of BSA tryptic digests (A) and BSA protein (B) on TPB-DMTP-COF according to pseudo-second-order rate equation;

The experimental kinetic data were fitted with the pseudo-first-order (Lagergren, 1) and pseudo-second-order rate equations (2), which were extensively used adsorption kinetic models in the solid - liquid phase system.

$$\frac{dq_t}{dt} = k_1 \cdot (q_e - q_t) \quad 1$$

$$\frac{dq_t}{dt} = k_2 \cdot (q_e - q_t)^2 \quad 2$$

After integral of the formula, and assumed the marginal conditions: when  $t=0$ ,  $q_t=0$ , the equation could be changed as follows:

$$\ln(q_e - q_t) = \ln q_e - k_1 t \quad 3$$

$$\frac{t}{q_t} = \frac{t}{q_e} + \frac{1}{k_2 q_e^2} \quad 4$$

Where  $q_e$  (mg/g) and  $q_t$  (mg/g) are the adsorption amount at equilibrium state and at time  $t$  (min), respectively;  $k_1$  ( $\text{min}^{-1}$ ) and  $k_2$  ( $\text{g}/(\text{mg} \cdot \text{min})$ ) are the rate constants of two models, respectively. After linear fitting of the kinetic data according to the linear function of  $\ln(q_e - q_t)$  and  $t$  (or  $t/q_t$  and  $t$ ), it was realized that the data fitting better to the pseudo-second-order model (Fig. S6) than the pseudo-first-order model (Fig. S8), for the former's

linearly dependent coefficient  $R^2 > 0.99$ . The adsorption rate constant  $k_2$  calculated from pseudo-second-order rate equation is  $2.44 \cdot 10^{-3}$  g/(mg·min) for BSA tryptic peptides and  $6.80 \cdot 10^{-4}$  g/(mg·min) for BSA protein on TPB-DMTP-COF.

**Figure S8.** Distributions of 6 peptides in eluents with 10-50% ACN at different pH values after extraction with TPB-DMTP-COF.

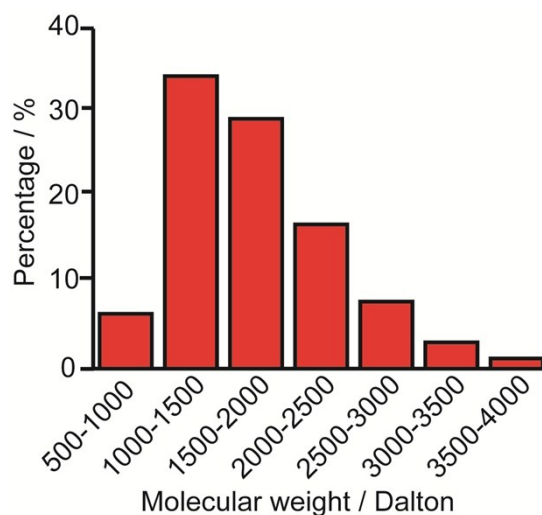

**Figure S9.** The molecular weight distribution for all of the identified endogenous peptides from human serum.

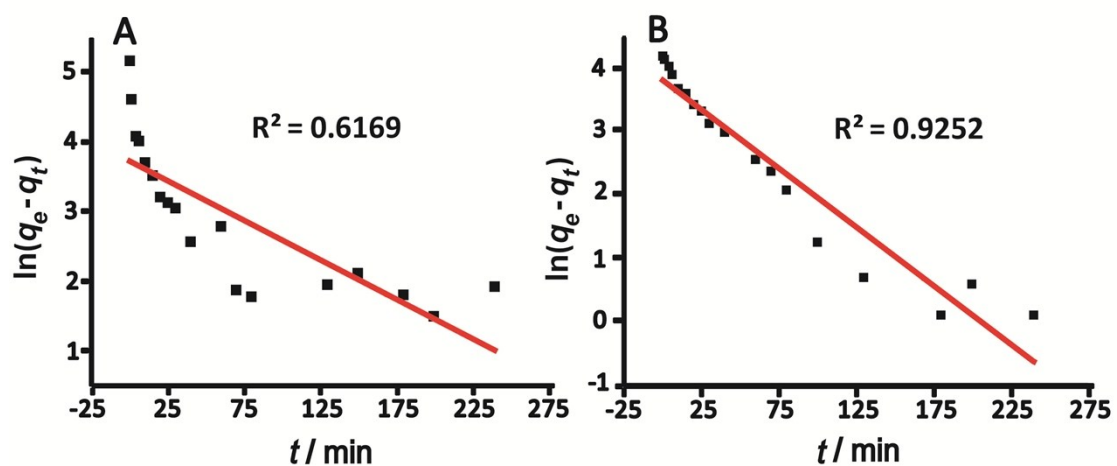

**Figure S10.** The linear fitting curves with the adsorption kinetic data of tryptic digests of BSA (A) and BSA protein (B) on TPB-DMTP-COF according pseudo-first-order rate equation.

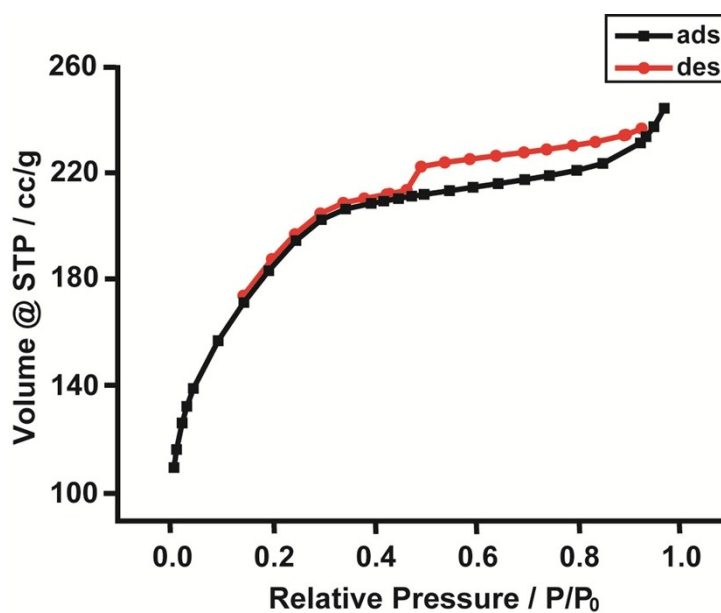

**Figure S11.** Nitrogen adsorption/desorption isotherm of MCM-41.



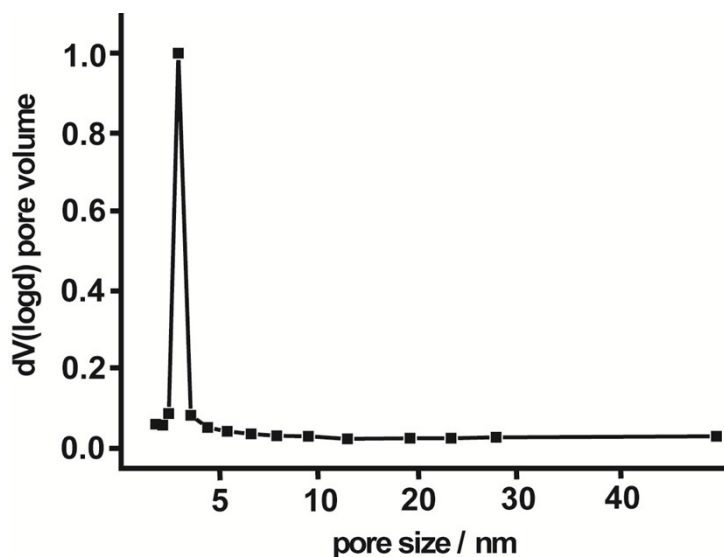

**Figure S12.** Pore size distribution of MCM-41.

**Table S1.** The detailed information of the 6 peptides in BSA digests.

| Code  | Sequence        | MW(Da) | pI   | GRAVY  | Aliphatic index |
|-------|-----------------|--------|------|--------|-----------------|
| Pep 1 | KVPQVSTPTLVEVSR | 1639.9 | 8.75 | -0.557 | 70.00           |
| Pep 2 | AEFVEVTK        | 922.5  | 4.53 | 0.175  | 85.00           |
| Pep 3 | LVNELTEFAK      | 1163.6 | 4.53 | 0.130  | 117.00          |
| Pep 4 | LVTDLTK         | 789.5  | 5.84 | 0.429  | 152.86          |
| Pep 5 | LGEYGFQNALIVR   | 1479.7 | 6.00 | 0.292  | 120.00          |
| Pep 6 | AWSVAR          | 688.8  | 9.79 | 0.267  | 81.67           |

**Table S2.** Human serum endogenous peptides detected in this study using TPB-DMTP-COF

| Sequence                  | MH+     | pI   | GRAVY  |
|---------------------------|---------|------|--------|
| H.RIHWESASLL.R            | 1211.65 | 6.75 | 0.020  |
| -.DIQM*TQSPSSVSA.S        | 1366.62 | 3.80 | -0.277 |
| K.SHALQLNRRQ.I            | 1180.62 | 9.49 | -1.310 |
| R.SLDRNLPSDSQDLGQHGLEED.F | 2325.06 | 4.10 | -1.371 |
| T.SSTSYNRGDSTFES.K        | 1537.64 | 4.37 | -1.379 |

|                                        |         |       |        |
|----------------------------------------|---------|-------|--------|
| Q.FTSSTSYNRGDS.T                       | 1321.56 | 5.84  | -1.250 |
| S.GEGDFLAEGGGVR.G                      | 1263.60 | 4.14  | -0.339 |
| N.TKSPLFM*GKVVNPTQK.-                  | 1790.98 | 10.30 | -0.475 |
| A.VDSGNDVTDIAD.D                       | 1220.53 | 3.52  | -0.392 |
| Y.GSGGGSYGSGGGGGHGSY.G                 | 1514.59 | 6.74  | -0.726 |
| N.TKSPLFMGKVVNPTQK.-                   | 1774.99 | 10.30 | -0.475 |
| P.YSYSTTAVVTNPKE.-                     | 1559.76 | 6.22  | -0.614 |
| S.TTAVVTNPKE.-                         | 1059.57 | 5.88  | -0.440 |
| S.DLQAQSKGNPEQTPV.L                    | 1611.80 | 4.37  | -1.347 |
| R.ASVGQDSPEPR.S                        | 1142.54 | 4.37  | -1.291 |
| Y.NTGGNPTEDVSVNSRPF.R                  | 1790.83 | 4.37  | -1.047 |
| L.PPTSAHGNVAEGETKPD.P                  | 1706.80 | 4.83  | -1.241 |
| G.EIVMTQSPATLSVSPGERATLS.C             | 2274.17 | 4.53  | 0.096  |
| S.APHGPGLIYRQPN.C                      | 1419.75 | 8.80  | -0.885 |
| E.KNPLPSKETIEQEKQAGES.-                | 2113.08 | 4.95  | -1.684 |
| R.ILGGHLDKGS.F                         | 1067.58 | 6.74  | 0.118  |
| S.SRQLGLPGPPDVPDHAAYHPF.R              | 2271.13 | 5.93  | -0.671 |
| K.SSSYSKQFTSSTSYNRGDST.F               | 2189.96 | 8.22  | -1.380 |
| C.GQDQVTVAM*TPR.S                      | 1318.64 | 5.84  | -0.525 |
| E.GKKLVAASQAALGL.-                     | 1326.81 | 10.00 | 0.707  |
| A.EEAGARVQQNVPSGTDGDPQSKPLG.D          | 2638.27 | 4.32  | -1.154 |
| N.HYTQKSLSLSPG.K                       | 1317.68 | 8.60  | -0.783 |
| R.RAVPPNNSNAAEDDLPTVELQGVPVPR.G        | 2758.41 | 4.32  | -0.596 |
| F.SLGSKINV.K                           | 817.48  | 8.47  | 0.388  |
| E.EGKKLVAASQAALGL.-                    | 1455.85 | 8.69  | 0.427  |
| -.DIQMTQSPSSLSA.S                      | 1364.64 | 3.80  | -0.308 |
| V.PPNNSNAAEDDLPTVELQGVPVPR.G           | 2432.20 | 3.92  | -0.739 |
| K.VNPFPRPGDSEPPPAPGAQRAQ.M             | 2188.09 | 6.04  | -1.205 |
| V.SETESRGSESGIFTNTKESS.S               | 2132.96 | 4.49  | -1.315 |
| P.LFVSPPTHGRPVIASPSYPCHSAIPHAGASLPPP.P | 3514.76 | 8.25  | 0.065  |
| K.QFTSSTSYNRGDSTFES.K                  | 1913.82 | 4.37  | -1.218 |
| S.SRQLGLPGPPDVPD.H                     | 1447.75 | 4.53  | -0.800 |
| A.EDPQGDAQAQKTDTS.H                    | 1599.69 | 4.22  | -1.913 |
| A.TKTAKDALSSVQESQVAQQA.R               | 2090.07 | 5.73  | -0.660 |

|                                  |         |       |        |
|----------------------------------|---------|-------|--------|
| A.EEAGARVQQNVPSGTDG              | 1758.82 | 4.14  | -1.065 |
| P.NSPLDEENLTQENQDRGTHVDLGLASAN.V | 3037.41 | 4.01  | -1.146 |
| K.SLAELGGHLDQQVEEF.R             | 1771.85 | 4.00  | -0.350 |
| G.VLSSRQLGLPGPPDVPDHAA.Y         | 2026.07 | 5.21  | -0.180 |
| L.VAASQAALGL.-                   | 900.52  | 5.49  | 1.430  |
| K.VNPFPRPGDSEPPPAPGAQ.R          | 1832.89 | 4.37  | -1.061 |
| D.SGEGDFLAEGGGVR.G               | 1350.63 | 4.14  | -0.371 |
| L.LSPYSYSTTAVVTNPKE.-            | 1856.93 | 6.22  | -0.424 |
| A.SVGQDSPEPR.S                   | 1071.51 | 4.37  | -1.600 |
| G.EIVM*TQSPATLSVSPGERATLS.C      | 2290.18 | 4.53  | 0.096  |
| R.TVVQPSVGAAA.G                  | 999.55  | 5.18  | 1.000  |
| G.EIVLTQSPATLSLSPGERATL.S        | 2183.19 | 4.53  | 0.210  |
| K.NPLPSKETIEQEKQAGES.-           | 1984.98 | 4.49  | -1.561 |
| F.DTASTGKTFFPG.F                 | 1081.52 | 5.84  | -0.736 |
| A.EDPQGDAQAQKTDTSHH.D            | 1736.75 | 4.64  | -1.994 |
| R.SVQLTEKR.M                     | 960.55  | 8.46  | -1.113 |
| K.GNPEQTPVLKPEEEAPAPEVGASKPEGLD  | 2870.44 | 4.21  | -0.929 |
| N.SQESVTEQD.S                    | 1022.43 | 3.88  | -1.733 |
| R.ATASPRSSGNIPSSPTASGGGSPTSPR.A  | 2581.27 | 12.00 | -0.796 |
| P.HGPGLIYRQPN.C                  | 1251.66 | 8.75  | -1.064 |
| R.AVPPNNSNAAEDDLPTVELQGVVPR.G    | 2602.31 | 3.92  | -0.440 |
| R.QLGLPGPPDVPDHAAAYHPF.R         | 2028.00 | 5.05  | -0.463 |
| R.ILGGHLDKAG.S                   | 980.55  | 6.74  | 0.210  |
| R.NVHSAGAAGSRMN.F                | 1271.59 | 9.76  | -0.431 |
| F.HVQPQPQPKPVQ.L                 | 1510.81 | 8.76  | -1.739 |
| F.MGKVVNPTQK.-                   | 1101.61 | 10.00 | -0.720 |
| Y.LQGAKIPKPEASFSPR.R             | 1725.97 | 9.99  | -0.713 |
| E.TQEK NPLPSKETIEQEKQAGES.-      | 2471.23 | 4.65  | -1.805 |
| P.GVLSSRQLGLPGPPDVPDHAA.Y        | 2083.09 | 5.21  | -0.191 |
| E.EIVKEVSTYIK.K                  | 1308.73 | 6.24  | -0.018 |
| Y.LQGAKIPKPEA.S                  | 1151.68 | 8.59  | -0.591 |
| R.SLDRNLPSDSQDLGQHGLEEDF.M       | 2472.13 | 3.96  | -1.182 |
| F.AEEGKKLVAASQAALGL.-            | 1655.93 | 6.19  | 0.277  |
| R.IHWESASL.L                     | 942.47  | 5.24  | 0.113  |

|                               |         |       |        |
|-------------------------------|---------|-------|--------|
| Y.GSGGGSYGS GGGGGGGRGSY.G     | 1590.65 | 8.59  | -0.775 |
| K.SHALQLNN.R                  | 896.46  | 6.46  | -0.638 |
| G.KKLVAASQAALGL.-             | 1269.79 | 10.00 | 0.792  |
| R.NGFKSHALQLNNRQ.I            | 1626.85 | 11.00 | -1.293 |
| A.NSPTAGAAKSSPAKPG.S          | 1511.78 | 10.00 | -0.647 |
| R.NVHSGSTF.F                  | 848.39  | 6.74  | -0.300 |
| A.EEAGARVQQNVPSG.T            | 1441.70 | 4.53  | -0.943 |
| K.SSSYSKQFTSS.T               | 1208.54 | 8.31  | -1.036 |
| K.PKNPANPVQ.R                 | 964.52  | 9.18  | -1.467 |
| A.ALLSPYSYSTTAVVTNPKE.-       | 2041.05 | 6.26  | -0.084 |
| K.THINIVVIGHVDSGK.S           | 1588.88 | 6.61  | 0.433  |
| A.PHGPGLIYRQPN.C              | 1348.71 | 9.18  | -1.108 |
| C.HPNSPLDEENLTQEN.Q           | 1736.77 | 4.00  | -1.887 |
| T.ADSGEGDFLAEGGGV.R           | 1380.59 | 3.43  | -0.160 |
| Y.YLQGAKIPKPEAS.F             | 1401.77 | 8.50  | -0.662 |
| K.SSSYSKQFTSSTSYNRGDSTFESKS.Y | 2768.23 | 8.15  | -1.352 |
| K.GSEM*VVAGKLQDR.G            | 1405.71 | 6.07  | -0.354 |
| T.SSTSYNRGDSTFESKSY.K         | 1915.83 | 5.79  | -1.488 |
| R.GSGGSYGGGGSGGGYGGGSGSR.G    | 1791.73 | 8.59  | -0.744 |
| R.NLPSDSQDLGQHGLEED.F         | 1853.82 | 3.94  | -1.400 |
| Y.TIAALLSPYSYSTTAVVTNPKE.-    | 2326.22 | 5.88  | 0.182  |
| C.GKPNPANPVQ.R                | 1149.64 | 10.00 | -1.591 |
| E.EAPSLRPAPPISGGGY.R          | 1665.86 | 6.10  | -0.482 |
| -.DIQM*TQSPSTL.S              | 1236.58 | 3.80  | -0.446 |
| I.HWESASLLR.S                 | 1098.57 | 6.75  | -0.478 |
| R.GSGGSHGGGSGFGGESGGSY.G      | 1714.67 | 5.24  | -0.667 |
| Q.EKNPLPSKETIEQEKQAGES.-      | 2242.12 | 4.65  | -1.775 |
| A.EDPQGDAAQKTDTSHHDQDHPTFN.K  | 2691.13 | 4.44  | -2.025 |
| R.SLDRNLPSDSQDLGQHG.L         | 1838.87 | 4.41  | -1.300 |
| G.DQTVSDNELQEMSNQGSKYVN.K     | 2386.05 | 3.92  | -1.410 |
| S.GGGGGGLGSGGSIR.S            | 1145.57 | 9.75  | -0.120 |
| R.VQEKQHPVPPPAQNQN.Q          | 1810.92 | 6.72  | -1.738 |
| S.EM*VVAGKLQ.D                | 990.53  | 6.10  | 0.511  |
| S.EEAERSDGPVQPAVLQVHQTS.-     | 2392.15 | 4.17  | -0.982 |

|                                     |         |       |        |
|-------------------------------------|---------|-------|--------|
| R.NVHSAGAAGSRM*N.F                  | 1287.59 | 9.76  | -0.431 |
| K.KVPQVSTPTLVEVSR.N                 | 1639.94 | 8.75  | -0.067 |
| K.QFTSSTSYNRGD.S                    | 1362.59 | 6.09  | -1.475 |
| R.EGVQKEDIPPADLSDQVPDTESETRILL.Q    | 3094.54 | 3.85  | -0.750 |
| L.PGPPDVPDH.A                       | 930.43  | 4.20  | -1.422 |
| G.DFLAEGGGVR.G                      | 1020.51 | 4.37  | -0.010 |
| G.EGDFLAEGGGV.R                     | 1050.47 | 3.57  | 0.046  |
| G.KPKNPANPVQ.R                      | 1092.62 | 10.00 | -1.710 |
| K.SPLFM*GKVVNPTQK.-                 | 1561.84 | 10.00 | -0.214 |
| K.KKEEEDEEDEEDEEEEEDEEDEDEEEDDDDD.E | 3877.28 | 3.33  | -3.526 |
| S.IQDWVQKTIAEN.-                    | 1444.74 | 4.37  | -0.667 |
| N.SGSSGPGSTGNRNPGSSGTGGTATWKPSSGP.G | 2847.29 | 11.00 | -1.066 |
| D.TNRASVGQDSPEPR.S                  | 1513.74 | 5.73  | -1.636 |
| K.SSSYSKQFTSSTSYN.R                 | 1673.73 | 8.22  | -1.180 |
| Q.FTSSTSYNRGDSTFES.K                | 1785.76 | 4.37  | -1.075 |
| L.SALEEYTKKLNTQ.-                   | 1524.79 | 5.86  | -1.223 |
| V.NDNEEGFFS.A                       | 1058.41 | 3.57  | -1.456 |
| Y.SYSTTAVVTNPKE.-                   | 1396.70 | 5.94  | -0.562 |
| Y.STTAVVTNPKE.-                     | 1146.60 | 5.94  | -0.473 |
| Y.TQKSLSLSPG.K                      | 1017.56 | 8.41  | -0.490 |
| L.GLPDVPDHAAY.H                     | 1405.67 | 4.20  | -0.507 |
| Y.ALTSEEAEERSDGPVQPAVLQVHQTS.-      | 2764.34 | 4.17  | -0.673 |
| S.NAAEDDLPTVELQGVVPR.G              | 1922.98 | 3.92  | -0.333 |
| Q.SGNSQESVTEQDSKD.S                 | 1610.68 | 4.12  | -1.900 |
| Y.NRGDSTFESKSY.K                    | 1390.62 | 6.07  | -1.742 |
| Q.FTSSTSYNRGDST.F                   | 1422.61 | 5.84  | -1.208 |
| V.LKPEEEAPAPEVGASKPEGL.D            | 2048.05 | 4.33  | -0.770 |
| G.EIVMTQSPATLSVSPGERATL.S           | 2187.13 | 4.53  | 0.138  |
| -.EIVLTQSPGTLSLSPGERA.T             | 1955.04 | 4.53  | -0.047 |
| K.CCTESLVNR.R                       | 1138.50 | 5.99  | 0.000  |
| K.DDPDAPLQPVTPLQLFEGR.R             | 2108.07 | 3.84  | -0.674 |
| Y.ALTSEEAEERSDGPVQPAVLQVHQ.T        | 2576.26 | 4.17  | -0.667 |
| V.DTNRASVGQDSPEPR.S                 | 1628.76 | 4.56  | -1.760 |
| K.MADEAGSEADHEGTHST.K               | 1744.67 | 4.17  | -1.200 |

|                                |         |       |        |
|--------------------------------|---------|-------|--------|
| A.NTQPRGPPASSPAPAK.F           | 1672.88 | 11.00 | -1.312 |
| R.NGFKSHALQLNNRQI.R            | 1739.93 | 11.00 | -0.907 |
| P.GSTGNRNPGSSGTGGTATWKPGSSGP.G | 2375.09 | 11.00 | -1.127 |
| A.EEAGARVQQNVPSGTDG.D          | 1815.85 | 4.14  | -1.028 |
| T.SEESTAALGCLVK.D              | 1235.64 | 5.72  | 0.650  |
| L.SPYSYSTTAVVTNPKE.-           | 1743.84 | 5.94  | -0.688 |
| R.NVHSGSTFF.K                  | 995.46  | 6.74  | 0.044  |
| G.DQTVSDNELQEMSNQG.S           | 1794.75 | 3.43  | -1.519 |
| A.DSGEGDFLAEGGGVR.G            | 1465.66 | 3.92  | -0.580 |
| P.SLTSDLQAQSKGNPEQTPV.L        | 1999.99 | 4.37  | -0.984 |
| A.NTQPRGPPASSPAPAKF.S          | 1819.95 | 11.00 | -1.083 |
| A.KVEQAVETEPEPELRQQT.E         | 2111.06 | 4.33  | -1.500 |
| P.FRPGDSEPPAPGAQRAQ.M          | 1877.93 | 6.07  | -1.356 |
| -.EIVLTQSPGTL.S                | 1157.64 | 4.00  | 0.464  |
| S.TSYNRGDSTFES.K               | 1363.58 | 4.37  | -1.475 |
| P.GVLSSRQLGLPGPPDVPDHA.A       | 2012.06 | 5.21  | -0.290 |
| -.DIQM*TQSPSSLSA.S             | 1380.63 | 3.80  | -0.308 |
| S.PYSYSTTAVVTNPKE.-            | 1656.81 | 6.63  | -0.680 |
| R.SEETKENEGFTVTAEGK.G          | 1855.86 | 4.32  | -1.394 |
| K.KLVAASQAALG.L                | 1028.61 | 8.75  | 0.946  |
| K.KLVAASQAALGL.-               | 1141.70 | 8.75  | 1.183  |
| A.KDALSSVQESQVAQQA.R           | 1688.85 | 4.37  | -0.606 |
| N.SQESVTEQDSK.D.S              | 1352.58 | 4.12  | -1.983 |
| R.SLAPYAQDTQEKL.N.H            | 1577.78 | 4.37  | -1.043 |
| G.EIVLTQSPATL.S                | 1171.66 | 4.00  | 0.664  |
| Y.LQGAKIPKPLDHTTEASFSPR.R      | 2249.21 | 8.60  | -0.733 |
| R.GSGGGSSGGSIGGRGSSSGGVK.S     | 1751.83 | 11.00 | -0.441 |
| R.SLDRNLPSDSQDLGQHGLEEDFM.L    | 2603.17 | 3.96  | -1.048 |
| K.SSSYSKQFTSSTSYNRGDSTFES.K    | 2553.11 | 5.79  | -1.265 |
| G.SPSGEVSHPRKT.R               | 1281.66 | 8.49  | -1.467 |
| G.KKLVAASQAALG.L               | 1156.70 | 10.00 | 0.542  |
| K.DDPDAPLQPVTP.L               | 1264.61 | 3.42  | -0.942 |
| A.DQLRTQVNTQAEQL.R             | 1643.84 | 4.37  | -1.200 |
| N.SNAAEDDLPTVELQGVVPR.G        | 2010.01 | 3.92  | -0.358 |

|                                    |         |       |        |
|------------------------------------|---------|-------|--------|
| G.EIVLTQSPATLSLSPGERA.T            | 1969.06 | 4.53  | 0.068  |
| P.PLPPPPPPPP.P                     | 1102.63 | 5.96  | -1.109 |
| P.NNSNAAEDDLPTVELQGVVPR.G          | 2238.10 | 3.92  | -0.657 |
| K.SYKMADEAGSEADHEGTHST.K           | 2122.86 | 4.49  | -1.320 |
| K.M*ADEAGSEADHEGTHST.K             | 1760.67 | 4.17  | -1.200 |
| V.SLGSPSGEVSHPRKT.R                | 1538.79 | 8.49  | -1.000 |
| S.SRQLGLPGPPDVPDHAA.Y              | 1726.89 | 5.19  | -0.635 |
| D.PEVRPTSAAVAA.-                   | 1097.60 | 6.43  | 0.100  |
| A.EEAGARVQQNVPSGTDGDPQ.S           | 2155.98 | 3.92  | -1.291 |
| K.VNPFPRPGDSEPPPAPGAQRAQMG.R       | 2376.15 | 6.04  | -1.035 |
| A.TPLPPTSAHGNVAEGETKPDVTER.C       | 2715.34 | 4.50  | -1.123 |
| R.VAPEEHPVLLTEAPLNPK.A             | 1954.06 | 4.75  | -0.267 |
| -.EIVLTQSPGTL.S.L                  | 1244.67 | 4.00  | 0.358  |
| A.DSGEGDFLAEGGGV.R                 | 1309.56 | 3.43  | -0.300 |
| N.YKILQADQEL.-                     | 1220.65 | 4.37  | -0.530 |
| E.GDFLAEGGGV.R.G                   | 1077.53 | 4.37  | -0.046 |
| R.TVVQPSVGAAAG.P                   | 1056.57 | 5.18  | 0.883  |
| Y.GGEEASGSGGGYGGGSGK.S             | 1527.63 | 4.53  | -0.905 |
| K.AVDTNRASVGQDSPEPR.S              | 1798.87 | 4.56  | -1.200 |
| K.KEEEEDEEDEDEEEEEDEEDEDEEEDDDDE.- | 3878.29 | 3.13  | -3.513 |
| R.QLGLPGPPDVPDHAA.Y.H              | 1646.82 | 4.20  | -0.425 |
| D.FLAEGGGV.R.G                     | 905.48  | 6.00  | 0.378  |
| T.ADSGEGDFLAEGGGV.R.G              | 1536.69 | 3.92  | -0.431 |
| S.SYSKQFTSSTSYNRGDST.F             | 2015.89 | 8.22  | -1.444 |
| K.SSSYSKQFTSSTSYNRGDSTFESKSY.K     | 2931.29 | 8.11  | -1.350 |
| N.AAEDDLPTVELQGVVPR.G              | 1808.94 | 3.92  | -0.147 |
| -.NIEM*TQSPSSL.S                   | 1222.56 | 4.00  | -0.455 |
| C.EVQLLESGLVQPGG.S                 | 1539.80 | 3.80  | 0.088  |
| S.PAAKPGSTPSRPS.S                  | 1252.67 | 11.01 | -1.131 |
| A.ATASRGASQAGAPQGRVPEARPN.S        | 2249.15 | 11.70 | -0.904 |
| -.NIEMTQSPSSLSASVG.D               | 1607.76 | 4.00  | -0.063 |
| F.AEEGKKLVAASQAALG.L               | 1542.85 | 6.19  | 0.056  |
| K.REEAPSLRPAPPISGGGY.R             | 1951.00 | 6.14  | -0.853 |
| A.EDPQGDAAQKTDTSHHD.Q              | 1851.77 | 4.49  | -2.082 |

|                                   |         |       |        |
|-----------------------------------|---------|-------|--------|
| H.NHYTQKSLSLSPG.K                 | 1431.73 | 8.60  | -0.992 |
| R.NGFKSHALQLNNRQIR.G              | 1896.03 | 12.01 | -1.131 |
| R.GGSGGGGGSSGGRGSGGGSSGGSIGGR.G   | 2079.91 | 12.00 | -0.618 |
| G.EIVMTQSPATLSVSPGERA.T           | 1973.00 | 4.53  | -0.011 |
| L.GLPGPPDVPDHAAYHPF.R             | 1786.85 | 5.05  | -0.535 |
| -.DIQMTQSPSSL.S                   | 1206.57 | 3.80  | -0.455 |
| K.GSEMVVAGKLQ.D                   | 1118.59 | 6.00  | 0.309  |
| I.AALLSPYSYSTTAVVTNPKE.-          | 2112.08 | 6.26  | 0.010  |
| K.SYKM*ADEAGSEADHEGTHST.K         | 2138.86 | 4.49  | -1.320 |
| V.SETESRGSESGIFTNTKES.S           | 2045.93 | 4.49  | -1.342 |
| N.GQPENNYKTTTPVLDSG.S             | 1931.90 | 4.03  | -1.444 |
| R.EEAPSLRPAPPPISGGGY.R            | 1794.90 | 4.53  | -0.650 |
| S.SYSKQFTSST.S                    | 1135.53 | 8.31  | -1.050 |
| F.ISAAAVPPGSLLSGP.G               | 1336.72 | 5.52  | 0.913  |
| -.NIEM*TQSPSSL.S.A                | 1309.60 | 4.00  | -0.483 |
| I.LGGHLDAKG.S                     | 867.47  | 6.74  | -0.267 |
| A.VPPNNSNAAEDDLPTVELQGVVPR.G      | 2531.27 | 3.92  | -0.533 |
| K.NMITGTSQADCAVLIVAAGVGEFEAGISK.N | 2909.43 | 4.14  | 0.693  |
| -.DIQMTQSPSTLSA.S                 | 1378.65 | 3.80  | -0.300 |
| S.SRQLGLPGPPDVPDHA.A              | 1655.85 | 5.19  | -0.788 |
| A.VDTNRASVGQDSPEPR.S              | 1727.83 | 4.56  | -1.388 |
| -.DIQMTQSP.S                      | 919.42  | 3.80  | -0.900 |
| N.SGALTSGVHTFPAVLQ.S              | 1584.84 | 6.46  | 0.644  |
| Q.DEPPQSPW.D                      | 955.42  | 3.67  | -2.125 |
| V.SLGSPSGEVSHPR.K                 | 1309.65 | 6.47  | -0.800 |
| H.YTQKSLSLSPG.K                   | 1180.62 | 8.59  | -0.564 |
| K.DDPDAPLQPVTPLQLFEGRRN.R         | 2378.21 | 4.23  | -0.991 |
| M.NFRPGVLS.S                      | 889.49  | 9.75  | 0.000  |
| Q.SGNSQESVTEQD.S                  | 1280.52 | 3.88  | -1.692 |
| R.QLGLPGPPDVPDHA.A                | 1412.72 | 4.20  | -0.521 |
| R.TLEIPGNSDPNMIPDGFNSYVR.V        | 2551.18 | 3.84  | -0.717 |
| N.NNYKILQADQEL.-                  | 1448.74 | 4.37  | -1.025 |
| G.DQTVSDNELQEMSNQGSKYVNKEIQNAVN.G | 3282.53 | 4.18  | -1.276 |
| V.QAAVGTSAAPVPSDNH.-              | 1521.73 | 5.08  | -0.250 |



|                                          |         |       |        |
|------------------------------------------|---------|-------|--------|
| A.EEGKKLVAASQAALGL.-                     | 1584.90 | 6.24  | 0.181  |
| L.SSRQLGLPGPPDVPDHA.A                    | 1742.88 | 5.19  | -0.788 |
| -.EIVLTQSPG.T                            | 943.51  | 4.00  | 0.222  |
| V.LLTEAPLNPK.A                           | 1095.64 | 6.00  | -0.160 |
| G.EGDFLAEGGGVR.G                         | 1206.57 | 4.14  | -0.333 |
| K.TETQEKNPLPSKETIEQEKQAGES.-             | 2701.31 | 4.48  | -1.829 |
| N.AVEEVTQNNFR.L                          | 1306.64 | 4.53  | -0.882 |
| A.EDPQGDAAQKTDTSHHDQ.D                   | 1979.83 | 4.34  | -2.161 |
| L.DRNLPSSDSDLGQHG.L                      | 1638.75 | 4.41  | -1.673 |
| S.GNSQESVTEQDSKD.S                       | 1523.65 | 4.12  | -1.979 |
| A.EVSADQVATV.M                           | 1018.51 | 3.67  | 0.420  |
| R.MNFRPGVLS.S                            | 1020.53 | 9.50  | 0.211  |
| N.PFRPGDSEPPAPGAQRAQ.M                   | 1974.98 | 6.50  | -1.368 |
| S.PLFMGKVVNPTQK.-                        | 1458.81 | 10.02 | -0.169 |
| R.TGKEKVTSGSTTTTR.R                      | 1553.81 | 9.99  | -1.213 |
| N.SGALTSGVHTFPAVLQS.S                    | 1671.87 | 6.46  | 0.559  |
| A.EEAGARVQQNVPSGTDGDPQSKP.L              | 2468.16 | 4.32  | -1.392 |
| R.GSGGSHGGGSGFGGESG.G                    | 1407.55 | 5.24  | -0.639 |
| S.STSYNRGDSTFES.K                        | 1450.61 | 4.37  | -1.423 |
| A.EDPQGDAAQKTDTS.H                       | 1462.63 | 3.84  | -1.821 |
| R.SLDRNLPSDSDLGQHGLEEDFM*.L              | 2619.16 | 3.96  | -1.048 |
| P.LPPTSAHGNVAEGE.T                       | 1378.66 | 4.81  | -0.543 |
| T.SDLQAQSKGNPEQTPVLKPEEEAPAPEVGASKPEGI.D | 3727.87 | 4.31  | -1.011 |
| G.DQTVSDNELQEM*SNQGSKYVNKEIQNAVN.G       | 3298.53 | 4.18  | -1.276 |
| -.DIQMTQSPS.S                            | 1006.45 | 3.80  | -0.889 |
| T.FTYAKVVALIAIIVM*GLVKLCQEIC.P           | 2868.57 | 8.03  | 1.764  |
| A.LLSPYSYSTTAVVTNPKE.-                   | 1970.01 | 6.22  | -0.189 |
| V.SGSTGQWHSESGSFRPDSPGSGN.A              | 2320.98 | 5.30  | -1.361 |
| R.ELLESYIDGR.I                           | 1194.60 | 4.14  | -0.540 |
| D.SGEGDFLAEGGGV.R                        | 1194.53 | 3.57  | -0.054 |
| A.EEAGARVQQNVPSGTDGDP.P                  | 1930.87 | 4.12  | -1.158 |
| K.SSSYSKQFTSSTSY.N                       | 1559.69 | 8.22  | -1.014 |
| K.LVAASQAALGL.-                          | 1013.60 | 5.52  | 1.646  |
| R.NLPSDSDLGQHGLEEDFM.L                   | 2131.92 | 3.77  | -1.005 |

|                             |         |       |        |
|-----------------------------|---------|-------|--------|
| -DIQMTQSPSTL.S              | 1220.58 | 3.80  | -0.446 |
| -EIVLTQSPGTLSPGERATL.S      | 2169.18 | 4.53  | 0.105  |
| R.ILGGHLDK.G                | 923.53  | 6.74  | 0.278  |
| S.SSYSKQFTSSTSYNRGDSTFES.K  | 2466.07 | 5.79  | -1.286 |
| R.M*NFRPGVLS.S              | 1036.52 | 9.50  | 0.211  |
| P.PASSPAPAPKFSPVTPKFTPVAS.K | 2281.22 | 10.02 | -0.104 |
| S.CPGSM*DEVLASLRHGRAPL.R    | 2082.00 | 6.74  | -0.063 |
| S.KFSPGAPGGSGSQPNQKLGHPEA.L | 2248.11 | 8.60  | -1.113 |
| S.GEGDFLAEGGGV.R            | 1107.50 | 3.57  | 0.008  |
| L.GLPGPPDVPDH.A             | 1100.54 | 4.20  | -0.855 |
| R.SGGGGGGGLGSGGSIR.S        | 1232.60 | 9.46  | -0.163 |
| R.PGVLSSRQL.G               | 956.55  | 10.18 | 0.022  |
| K.TAKDALSSVQESQVAQQA.R      | 1860.93 | 4.37  | -0.478 |
| C.HPNSPLDEEN.L              | 1151.50 | 4.13  | -2.090 |
| T.SEEAERSDGPVQPAVLQVHQT.S.- | 2479.17 | 4.17  | -0.974 |
| T.SIQDWVQKTIAEN.-           | 1531.78 | 4.37  | -0.677 |
| C.EVQLLESGGGLVQPGGSLRLS.C   | 2096.14 | 4.53  | 0.138  |
| D.WVQKTIAEN.-               | 1088.57 | 6.00  | -0.611 |
| R.NVHSAGAAGSRM.N            | 1157.55 | 9.76  | -0.175 |
| R.TATSEYQTFNPR.T            | 1561.73 | 5.66  | -1.031 |
| H.TASYGMSLI.V               | 942.47  | 5.18  | 0.889  |
| -DIQMTQSPSSVSA.S            | 1350.62 | 3.80  | -0.277 |
| T.NRASVGQDSPEPR.S           | 1412.69 | 6.07  | -1.708 |
| S.SSYSKQF.T                 | 846.40  | 8.31  | -1.186 |
| G.SEMVVAGKLQ.D              | 1061.57 | 5.72  | 0.380  |
| F.TSSTSYNRGDSTFESKSY.K      | 2016.88 | 5.73  | -1.444 |
| E.GKKLVAASQAALG.L           | 1213.73 | 10.00 | 0.469  |
| A.ATASRGASQAGAPQGRV.P       | 1584.82 | 12.00 | -0.465 |
| V.AASQAALGL.-               | 801.45  | 5.57  | 1.122  |
| R.IHWESASLLR.S              | 1211.65 | 6.75  | 0.020  |
| R.GPPASSPAPAPK.F            | 1076.57 | 8.75  | -0.708 |
| K.VIHDNFGIVEGLMTTVHAIATQK.T | 2595.36 | 5.99  | 0.429  |
| K.KVEEEDEEEEEEEEEEEEEDE.-   | 2799.05 | 3.43  | -3.168 |
| R.GSGGSHGGGSGFGGESGS.Y      | 1551.61 | 6.61  | 0.433  |

|                                    |         |       |        |
|------------------------------------|---------|-------|--------|
| Y.AASSLQSGVPSR.F                   | 1159.61 | 3.52  | -0.392 |
| K.SPLFMGKVVNPTQK.-                 | 1545.85 | 9.79  | -0.133 |
| A.GTELVNFLSYFVELGTQPATQ.-          | 2314.16 | 6.61  | 0.433  |
| P.KNPANPVQ.R                       | 867.47  | 3.84  | -0.674 |
| K.TIGGGDDSFNTFFSETGAGK.H           | 2007.89 | 5.99  | 0.429  |
| N.FLSYFVELGTQPATQ.-                | 1700.85 | 4.03  | -0.445 |
| A.VDSGNDVTDIADD.G                  | 1335.55 | 10.30 | -0.475 |
| R.IHWESASLL.R                      | 1055.55 | 4.32  | -1.394 |
| H.RIHWESASLLR.S                    | 1367.75 | 5.93  | -0.671 |
| R.GSGGSHGGGSGFGGE.S                | 1263.50 | 4.32  | -1.394 |
| L.YLYEIAR.R                        | 927.49  | 8.60  | -0.783 |
| L.GLPGPPDVPDHA.A                   | 1171.57 | 10.00 | 0.792  |
| C.DIQM*TQSPSSLSA.S                 | 1380.63 | 6.74  | -0.726 |
| Q.SGNSQESVTEQDSKDSTY.S             | 1961.82 | 3.33  | -3.526 |
| K.KKNEPEDEEEEEEEDEDEEEEEDED.E      | 3126.12 | 5.99  | 0.429  |
| A.GTELVNFLSYFVELGTQPAT.Q           | 2186.10 | 4.00  | 0.213  |
| Q.FTSSTSYNRGDSTFESKSY.K            | 2163.95 | 3.57  | 0.008  |
| K.GSEM*VVAGKLQ.D                   | 1134.58 | 6.61  | 0.433  |
| L.SRSGGGGGGLGSGGSIRSSY.S           | 1812.86 | 8.59  | -0.775 |
| R.KKVEEEDEEEEEEEEEEEEEEED.E        | 2798.05 | 8.15  | -1.352 |
| R.AFVHWYVGEGMEEGEFSEAR.E           | 2330.02 | 3.84  | -0.674 |
| A.EDPQGDAAQKTD.T                   | 1274.55 | 3.65  | -3.186 |
| V.VIGHVDSGK.S                      | 911.50  | 9.46  | -0.163 |
| G.NSQESVTEQDSKDSTY.S               | 1817.77 | 4.37  | -1.075 |
| R.GSGGSHGGGSGFGGESGGSYGGGEEA.S     | 2214.87 | 6.61  | 0.433  |
| Y.GGGEEASGSGGGYGGGSGKSSHS.-        | 1925.79 | 5.79  | -1.265 |
| S.SYSKQFTSSTSYNRGDSTFES.K          | 2379.04 | 10.00 | 0.542  |
| K.TFPGFFSPMLGEFV.S                 | 1575.76 | 5.99  | 0.429  |
| R.DAHKSEVAHRFKDL.G                 | 1652.87 | 6.92  | -1.114 |
| Y.YLQGAKIPKPEASFSPR.R              | 1889.03 | 9.70  | -0.747 |
| R.DAHKSEVAHRFKDLG.E                | 1709.87 | 6.92  | -1.067 |
| R.MNFRPGVLSSRQLGLPGPPDVPDHAAYHPF.R | 3272.64 | 6.69  | -0.407 |
| G.DQTVSDNELQEM*SNQG.S              | 1810.74 | 3.43  | -1.519 |
| S.STSYNRGDSTFESKSY.K               | 1828.80 | 5.79  | -1.531 |

|                                       |         |      |        |
|---------------------------------------|---------|------|--------|
| S.YSTTAVVTNPKE.-                      | 1309.66 | 6.22 | -0.542 |
| C.SVMHEALHNHYTQKSLSLSPG.K             | 2336.14 | 6.78 | -0.567 |
| R.NVNFQKAIN.E                         | 1047.56 | 8.75 | -0.511 |
| T.GIFTDQVLSVLKGEE.-                   | 1634.86 | 4.43 | 0.207  |
| R.SSKITHRIHWESASLLR.S                 | 2021.10 | 6.74 | -0.300 |
| R.PGVLSSRQLGLPGPPDVPDHAAYHPF.R        | 2724.39 | 6.61 | 0.433  |
| R.MNFRPGVLSSRQLGLPGPPDVPDHA.A         | 2657.36 | 4.00 | 0.213  |
| N.DSGPRRYTIAALLSPYSYSTTAVVTNPKE.-     | 3157.61 | 6.50 | -0.428 |
| C.FAEEGKKLVAASQAALGL.-                | 1803.00 | 6.61 | 0.433  |
| R.DAHKSEVAHRFKDLGEEN.F                | 2082.00 | 8.43 | -0.435 |
| G.DQTVSDNELQEM*SNQGSKYVNKEIQN.A       | 3014.36 | 5.39 | -1.472 |
| K.CDSSPDSAEDVR.K                      | 1337.53 | 4.18 | -1.519 |
| A.DEAGSEADHEGTHSTKRGHAKSRPV.R         | 2659.26 | 5.94 | -0.473 |
| R.GDSTFESKSY.K                        | 1120.48 | 6.69 | -0.407 |
| R.QLGLPGPPDVPDHAA.Y                   | 1483.76 | 3.92 | -0.440 |
| C.EVQLVESGGGLVQPG.G                   | 1468.76 | 5.93 | -0.671 |
| K.SYKMADEAGSEADHEGTHSTK.R             | 2250.96 | 8.22 | -1.014 |
| S.SYSKQFTSSTSYN.R                     | 1499.67 | 3.33 | -3.526 |
| N.SQESVTEQDSKDSTY.S                   | 1703.73 | 8.22 | -1.239 |
| S.SSYSKQFTSST.S                       | 1222.56 | 3.92 | -1.773 |
| T.ECCHGDLLECADDR.A                    | 1749.66 | 5.88 | -0.440 |
| I.THRIHWESASLLR.S                     | 1605.86 | 4.17 | -1.200 |
| F.TSSTSYNRGDSTFES.K                   | 1638.69 | 8.59 | -0.744 |
| I.THRIHWESASLL.R                      | 1449.76 | 5.39 | -1.472 |
| N.IFFMSKVTNPKQA.-                     | 1510.81 | 4.18 | -1.276 |
| C.SVM*HEALHNHYTQKSLSLSPG.K            | 2352.14 | 8.11 | -1.350 |
| M.ADEAGSEADHEGTHST.K                  | 1613.63 | 6.62 | -0.308 |
| F.TDQVLSVLKGEE.-                      | 1317.69 | 8.46 | -1.113 |
| C.EVQLVESGGGLVQPGSLRLS.C              | 2082.14 | 4.17 | -1.394 |
| G.NSQESVTEQDSKD.S                     | 1466.62 | 6.61 | 0.433  |
| N.FLSYFVELGTQPAT.Q                    | 1572.79 | 6.75 | -0.478 |
| K.SSYSKQFT.S                          | 1034.48 | 6.61 | 0.433  |
| R.TAFGGRRVPPNNSNAEDDLPTVELQGVVPR.G    | 3347.71 | 4.17 | -0.673 |
| V.SETESRGSESGIFTNTKESSSHHPGIAEFPSRG.K | 3505.62 | 6.61 | 0.433  |

|                                                |         |       |        |
|------------------------------------------------|---------|-------|--------|
| R.M*NFRPGVLSSRQLGLPGPPDVPDHAA.Y                | 2744.39 | 8.31  | -1.089 |
| R.DAHKSEVAHRF.K                                | 1296.65 | 5.39  | -1.472 |
| R.ILGGHLDAKGSFPWQ.A                            | 1625.84 | 4.78  | -0.528 |
| L.SSRQLGLPGPPDVPDHAAAYHPF.R                    | 2358.16 | 5.44  | -1.127 |
| N.LDVSLQLPSR.S                                 | 1127.64 | 6.92  | -1.067 |
| Y.GGGSGSGGGSGGGYGGGSGGGHSGGSGGGHSGGSG<br>GNY.G | 2855.11 | 9.76  | -0.431 |
| R.YEGSYALTSEEAEERSDGPVQPAVLQVHQTS.-            | 3363.56 | 6.61  | 0.433  |
| A.DEAGSEADHEGTHST.K                            | 1542.59 | 11.00 | -1.127 |
| S.SSYSKQFTSSTSYNRGDST.F                        | 2102.93 | 4.37  | -0.010 |
| C.DIQM*TQSPSSL.S                               | 1222.56 | 3.96  | -1.182 |
| E.LLRTLNPDSQLQLTTGNGLFLSE.G                    | 2658.41 | 6.61  | 0.433  |
| Y.FVELGTQPATQ.-                                | 1190.61 | 10.00 | 0.707  |
| K.HFSVEGQLEFR.A                                | 1348.67 | 4.08  | -0.800 |
| R.QLGLPGPPDVPDHAAAYHPFR.R                      | 2184.10 | 4.17  | -1.607 |
| C.EVQLVESGGGLVQPGG.S                           | 1525.79 | 3.80  | -0.455 |
| R.IVEGSDAEIGM*SPWQVMLFRKSPQELL.C               | 3076.59 | 4.00  | -0.118 |
| G.VLSSRQLGLPGPPDVPDHA.A                        | 1955.03 | 6.61  | 0.433  |
| K.SLEDKTERELLESYIDGR.I                         | 2153.08 | 5.24  | -0.639 |
| G.DQTVSDNELQEM*SNQGSKYVN.K                     | 2402.04 | 6.61  | 0.433  |
| C.DIQMTQSPSSLSA.S                              | 1364.64 | 5.44  | -1.127 |
| G.DSTFESKSY.K                                  | 1063.46 | 4.41  | 0.019  |
| S.SYSKQFTSSTSYNRGDSTFESKSY.K                   | 2757.23 | 6.69  | -0.407 |
| S.RQLGLPGPPDVPDHAAAYHPF.R                      | 2184.10 | 3.84  | -0.717 |
| G.VLSSRQLGLPGPPDVPDHAAAYHPF.R                  | 2570.31 | 8.11  | -1.396 |
| G.SPMYSIITPNILRLE.S                            | 1746.94 | 5.19  | -0.635 |
| K.HNDDEQYAWESSAGGSFTVR.T                       | 2255.96 | 4.32  | -1.394 |
| -.EIVLTQSPGTLSSL.S                             | 1357.76 | 3.92  | -0.533 |
| N.FRPGVLSSRQLGLPGPPDVPDHAAAYHPF.R              | 3027.56 | 3.92  | -0.431 |
| K.SSSYSKQFTS.S                                 | 1121.51 | 5.98  | -0.288 |
| C.DIQM*TQSPSS.L                                | 1109.48 | 5.94  | 0.313  |
| K.MADEAGSEADHEGTHSTK.R                         | 1872.77 | 6.92  | -0.379 |
| C.DIQMTQSPS.S                                  | 1006.45 | 8.15  | -1.352 |
| R.NVHSGSTFFKYLLQGAKIPKPEA.S                    | 2582.34 | 3.43  | -0.160 |
| A.EDPQGDAQAQKTD.T                              | 1375.60 | 4.32  | -0.596 |

|                                     |         |      |        |
|-------------------------------------|---------|------|--------|
| R.M*NFRPGVLSSRQLGLPGPPDVPDHAAYHPF.R | 3288.64 | 5.98 | -0.288 |
| P.HFFPK.S                           | 822.43  | 5.88 | 0.182  |
| P.GVLSSRQLGLPGPPDVPDHAAYHPF.R       | 2627.33 | 8.60 | -0.733 |

---

## References

1 H. Xu, J. Gao, D. Jiang, Nat. Chem., 2015, 7, 905–912.
